# Supplementary material
Source: PubMed Central journal article supplement (PMC3081032)
Supplement: 1103397108_pnas.1103397108_SI.pdf [file 1103397108_pnas.1103397108_SI.pdf]

# Supporting Information

## Lacroix and Bezanilla 10.1073/pnas.1103397108

### SI Text

**Q – V Curve Fits.** The equation used to fit the  $Q - V$  curves was the following sum of two Boltzmann distributions:

$$Q/Q_{\max} = \frac{Z_0}{Z_0 + Z_1} \frac{1}{1 + \exp(-Z_0 F(V - V_0)/RT)} + \frac{Z_1}{Z_0 + Z_1} \frac{1}{1 + \exp(-Z_1 F(V - V_1)/RT)}$$

With  $Z_0$  and  $Z_1$ , the apparent valences of the first and the second transition, respectively,  $V_0$  and  $V_1$ , the midpoints of the first and the second transition, respectively, and  $V$ ,  $F$ ,  $R$ , and  $T$  the membrane potential, the Faraday constant, the gas constant, and absolute temperature, respectively.

The goodness of the fit and values of the fitted parameters are shown in Table S1.

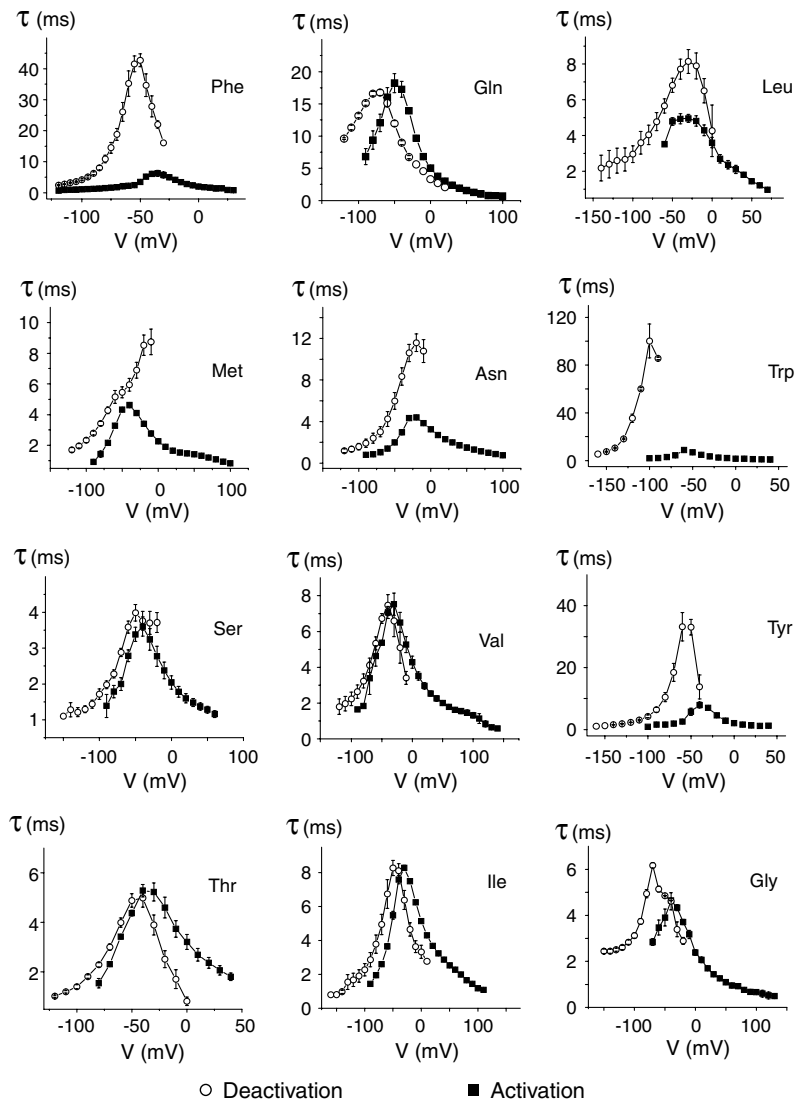

**Fig. S1.** Time constants ( $\tau$ , in ms) of Shaker gating currents as a function of the pulse voltage ( $V$ , in mV) and of the residue present at position 290 (indicated on each graph). Gating currents were measured during activation (black squares) and deactivation (open circles). Wild-type gating kinetics are shown at Phe (Top Left). The data represent at least six independent experiments for each mutant.
